# Supplementary material for: The Fusion of MRI and CT Medical Images Using Variational Mode Decomposition
Source: MDPI journal article supplement (doi:10.3390/app112210975), 2021-11-19
Supplement: s1 [file s1]

## Set-1

Qualitative Results:

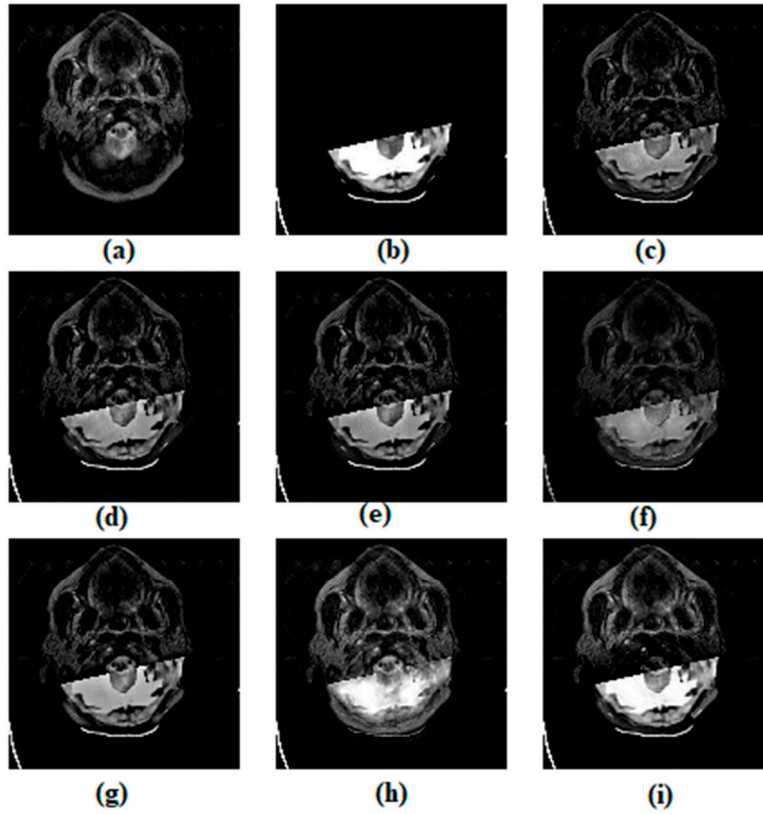

Figure S1 Visual Quality analysis of various fusion algorithms for MRI-CT (a) MRI image, (b) CT image, (c) ASR, (d) CVT, (e) DTCWT, (f) MSVD, (g) CSMCA, (h) NSST, (i) Proposed method

Quantitative Results:

Table S1. Quantitative analysis of various fusion methods for MRI-CT image pairs image pairs (Set-1)

| Metrics\Methods | ASR     | CVT     | DTCWT   | MSVD    | CSMCA   | NSST    | Proposed Method |
|-----------------|---------|---------|---------|---------|---------|---------|-----------------|
| <b>EI</b>       | 56.2842 | 58.3557 | 58.2284 | 35.8497 | 57.5471 | 61.3513 | 63.2695         |
| <b>MI</b>       | 2.6832  | 2.3258  | 2.4148  | 2.9294  | 2.6481  | 3.3425  | 2.9435          |
| <b>VIFF</b>     | 0.2778  | 0.2504  | 0.2328  | 0.2524  | 0.2952  | 0.3051  | 0.343           |
| $Q_P^{AB/F}$    | 0.6439  | 0.6093  | 0.6279  | 0.2778  | 0.6548  | 0.5867  | 0.6788          |
| <b>SSIM</b>     | 0.6249  | 0.3932  | 0.495   | 0.5164  | 0.5672  | 0.6975  | 0.6182          |
| <b>RMSE</b>     | 0.0319  | 0.0317  | 0.0318  | 0.0312  | 0.032   | 0.0145  | 0.0204          |
| <b>AG</b>       | 5.6663  | 5.8262  | 5.8275  | 3.7763  | 5.7212  | 6.1815  | 6.2962          |

|             |             |             |         |             |         |             |         |
|-------------|-------------|-------------|---------|-------------|---------|-------------|---------|
| <b>PSNR</b> | 18.089<br>3 | 17.990<br>8 | 18.0981 | 17.698<br>9 | 18.4951 | 16.183<br>5 | 18.3887 |
|-------------|-------------|-------------|---------|-------------|---------|-------------|---------|

## Set-2

Qualitative Results:

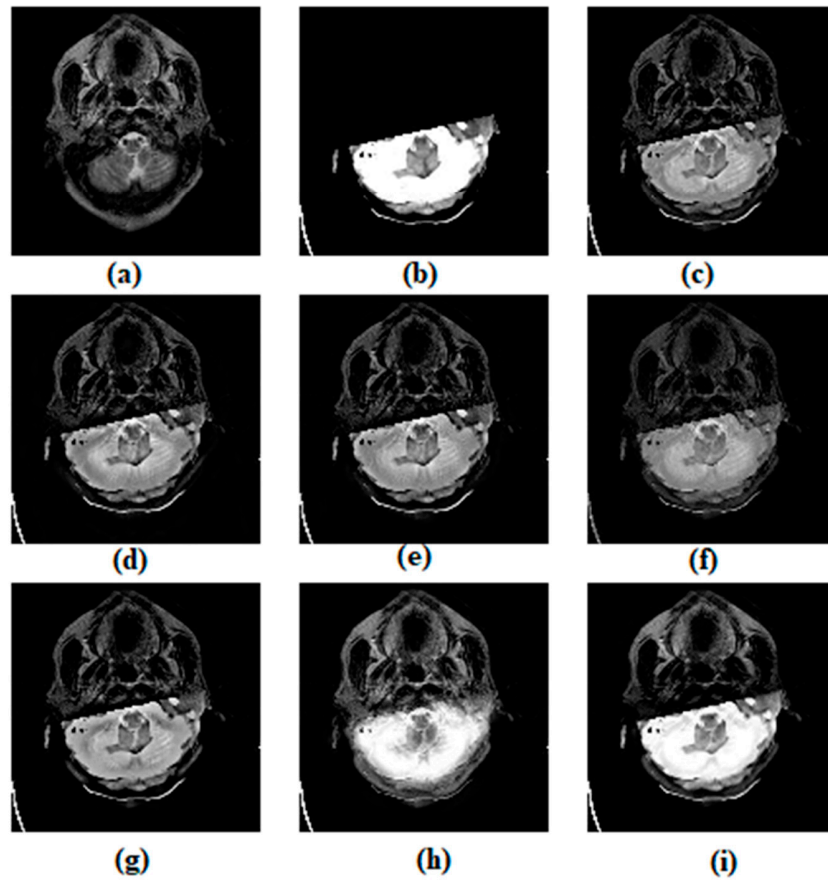

Figure S2 Visual Quality analysis of various fusion algorithms for MRI-CT (a) MRI image, (b) CT image, (c) ASR, (d) CVT, (e) DTCWT, (f) MSVD, (g) CSMCA, (h) NSST, (i) Proposed method

Quantitative Results:

Table S2. Quantitative analysis of various fusion methods for MRI-CT image pairs (set-2).

| Metrics\Method | ASR     | CVT     | DTCWT   | MSVD    | CSMCA   | NSST    | Proposed Method |
|----------------|---------|---------|---------|---------|---------|---------|-----------------|
| <b>EI</b>      | 60.4616 | 63.3194 | 62.2319 | 43.9701 | 61.7147 | 63.6631 | 64.755          |
| <b>MI</b>      | 2.9756  | 2.6293  | 2.6902  | 3.1771  | 2.8151  | 3.3717  | 2.9704          |
| <b>VIFF</b>    | 0.3196  | 0.2935  | 0.2715  | 0.3012  | 0.2782  | 0.3226  | 0.3728          |
| $Q_P^{AB/F}$   | 0.6435  | 0.5874  | 0.6047  | 0.3737  | 0.6432  | 0.55    | 0.6473          |

|             |         |         |         |         |         |         |         |
|-------------|---------|---------|---------|---------|---------|---------|---------|
| <b>SSIM</b> | 0.604   | 0.318   | 0.4461  | 0.5549  | 0.5446  | 0.6256  | 0.594   |
| <b>RMSE</b> | 0.0299  | 0.0298  | 0.0299  | 0.0289  | 0.03    | 0.0174  | 0.0239  |
| <b>AG</b>   | 6.1179  | 6.3515  | 6.2771  | 4.8272  | 6.1705  | 6.4151  | 5.9265  |
| <b>PSNR</b> | 16.1831 | 16.1112 | 16.2326 | 15.9758 | 16.4273 | 15.6406 | 18.2992 |

### Set-3

Qualitative Results:

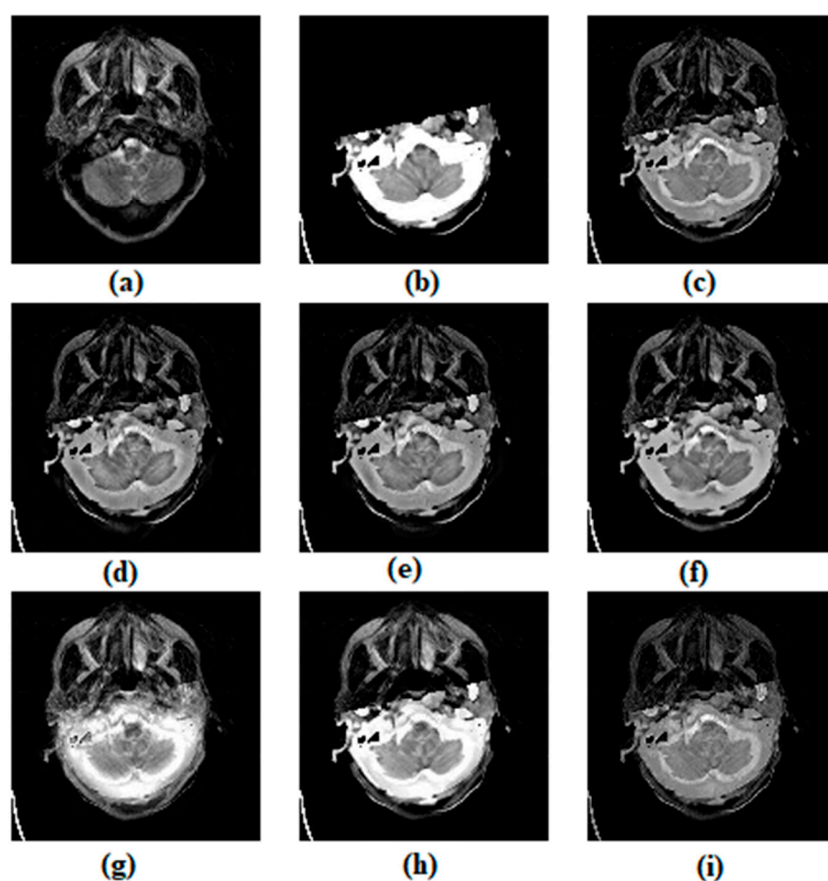

Figure S3 Visual Quality analysis of various fusion algorithms for MRI-CT (a) MRI image, (b) CT image, (c) ASR, (d) CVT, (e) DTCWT, (f) MSVD, (g) CSMCA, (h) NSST, (i) Proposed method

# Quantitative Results:

Table S3. Quantitative analysis of various fusion methods for MRI-CT image pairs (set-3).

| Metrics\Method | ASR     | CVT     | DTCWT   | MSVD    | CSMCA   | NSST    | Proposed Method |
|----------------|---------|---------|---------|---------|---------|---------|-----------------|
| <b>EI</b>      | 68.3278 | 71.3639 | 70.9627 | 56.9793 | 70.1726 | 70.567  | 73.1176         |
| <b>MI</b>      | 3.2084  | 2.8125  | 2.9043  | 3.3929  | 3.0746  | 3.5197  | 3.3535          |
| <b>VIFF</b>    | 0.2734  | 0.2508  | 0.2259  | 0.29    | 0.2571  | 0.2963  | 0.3465          |
| $Q_p^{AB/F}$   | 0.5982  | 0.5359  | 0.5579  | 0.4349  | 0.6057  | 0.488   | 0.5959          |
| <b>SSIM</b>    | 0.5659  | 0.3074  | 0.4089  | 0.5518  | 0.5047  | 0.6105  | 0.5822          |
| <b>RMSE</b>    | 0.0285  | 0.0285  | 0.0288  | 0.0277  | 0.0286  | 0.0204  | 0.0204          |
| <b>AG</b>      | 6.9026  | 7.1609  | 7.1443  | 6.093   | 6.9973  | 7.1528  | 7.304           |
| <b>PSNR</b>    | 15.989  | 15.9552 | 16.1199 | 15.6553 | 16.3009 | 14.7776 | 17.0023         |

## Set-4

# Qualitative Results:

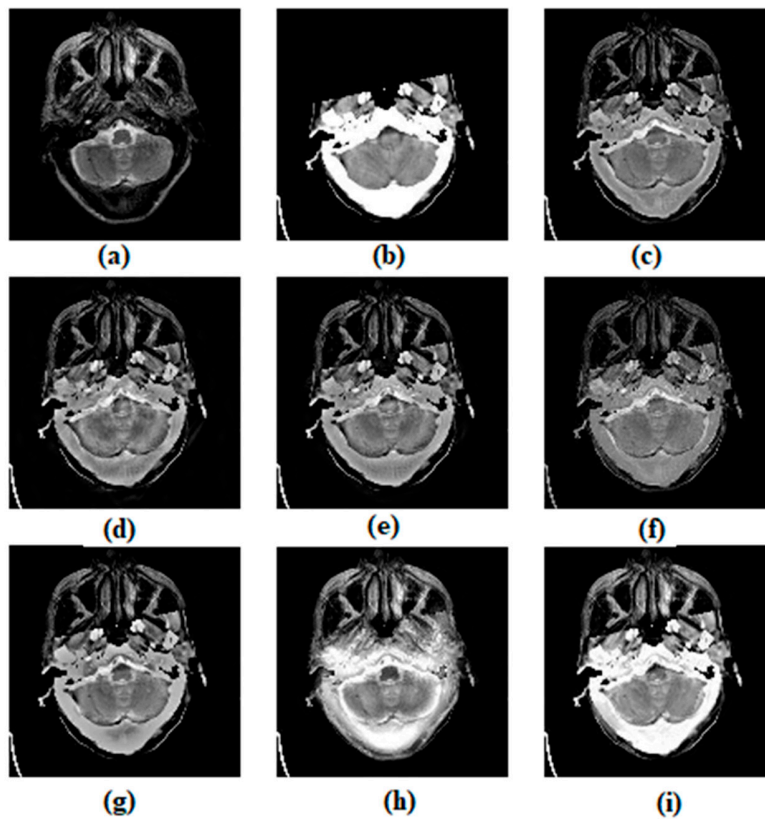

Figure S4 Visual Quality analysis of various fusion algorithms for MRI-CT (a) MRI image, (b) CT image, (c) ASR, (d) CVT, (e) DTCWT, (f) MSVD, (g) CSMCA, (h) NSST, (i) Proposed method

Quantitative Results:

Table S4. Quantitative analysis of various fusion methods for MRI-CT image pairs (set-4).

| Metrics\Method | ASR     | CVT     | DTCWT   | MSVD    | CSMCA   | NSST    | Proposed Method |
|----------------|---------|---------|---------|---------|---------|---------|-----------------|
| <b>EI</b>      | 74.9936 | 81.2307 | 79.2072 | 65.8973 | 77.6089 | 77.4143 | 85.8038         |
| <b>MI</b>      | 3.3259  | 2.9178  | 2.9851  | 3.4635  | 3.1893  | 3.4308  | 3.6212          |
| <b>VIFF</b>    | 0.2762  | 0.2618  | 0.2471  | 0.2991  | 0.2594  | 0.279   | 0.3349          |
| $Q_p^{AB/F}$   | 0.5779  | 0.5287  | 0.5508  | 0.4437  | 0.5933  | 0.4512  | 0.5888          |
| <b>SSIM</b>    | 0.5513  | 0.282   | 0.4278  | 0.5655  | 0.5997  | 0.578   | 0.5618          |
| <b>RMSE</b>    | 0.031   | 0.0304  | 0.0309  | 0.0307  | 0.031   | 0.0241  | 0.0168          |
| <b>AG</b>      | 7.5941  | 8.1573  | 7.9882  | 7.087   | 7.765   | 7.8385  | 8.5067          |
| <b>PSNR</b>    | 15.3526 | 15.2879 | 15.56   | 14.8721 | 15.7447 | 14.2176 | 16.7652         |

#### Set-5

Qualitative Results:

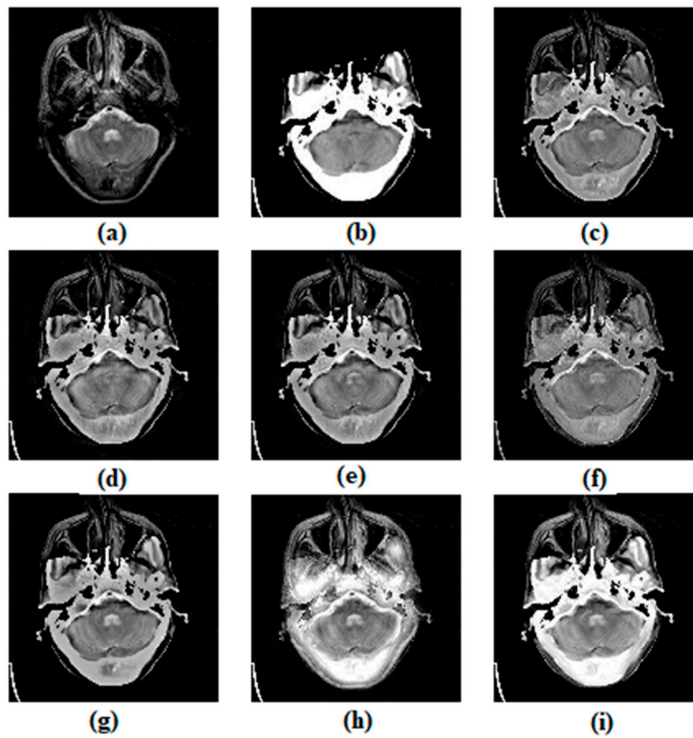

Figure S5 Visual Quality analysis of various fusion algorithms for MRI-CT (a) MRI image, (b) CT image, (c) ASR, (d) CVT, (e) DTCWT, (f) MSVD, (g) CSMCA, (h) NSST, (i) Proposed method

Quantitative Results:

Table S5. Quantitative analysis of various fusion methods for MRI-CT image pairs (set-5).

| Metrics\Method | ASR     | CVT     | DTCWT   | MSVD    | CSMCA   | NSST    | Proposed Method |
|----------------|---------|---------|---------|---------|---------|---------|-----------------|
| <b>EI</b>      | 81.5778 | 86.6207 | 85.1826 | 71.696  | 83.3975 | 80.1446 | 89.067          |
| <b>MI</b>      | 3.48    | 3.1366  | 3.1924  | 3.6202  | 3.3922  | 3.507   | 3.7856          |
| <b>VIFF</b>    | 0.2949  | 0.2627  | 0.2581  | 0.3125  | 0.2874  | 0.2664  | 0.3975          |
| $Q_P^{AB/F}$   | 0.557   | 0.5151  | 0.5371  | 0.4288  | 0.575   | 0.3944  | 0.5552          |
| <b>SSIM</b>    | 0.4906  | 0.3223  | 0.4105  | 0.5014  | 0.5374  | 0.5288  | 0.4913          |
| <b>RMSE</b>    | 0.032   | 0.0317  | 0.032   | 0.032   | 0.0324  | 0.0256  | 0.0201          |
| <b>AG</b>      | 8.277   | 8.7127  | 8.5992  | 7.7476  | 8.3486  | 8.1937  | 8.9349          |
| <b>PSNR</b>    | 15.3131 | 15.6593 | 15.8248 | 14.4995 | 16.2079 | 14.0726 | 17.9813         |

#### Set-6

Qualitative Results:

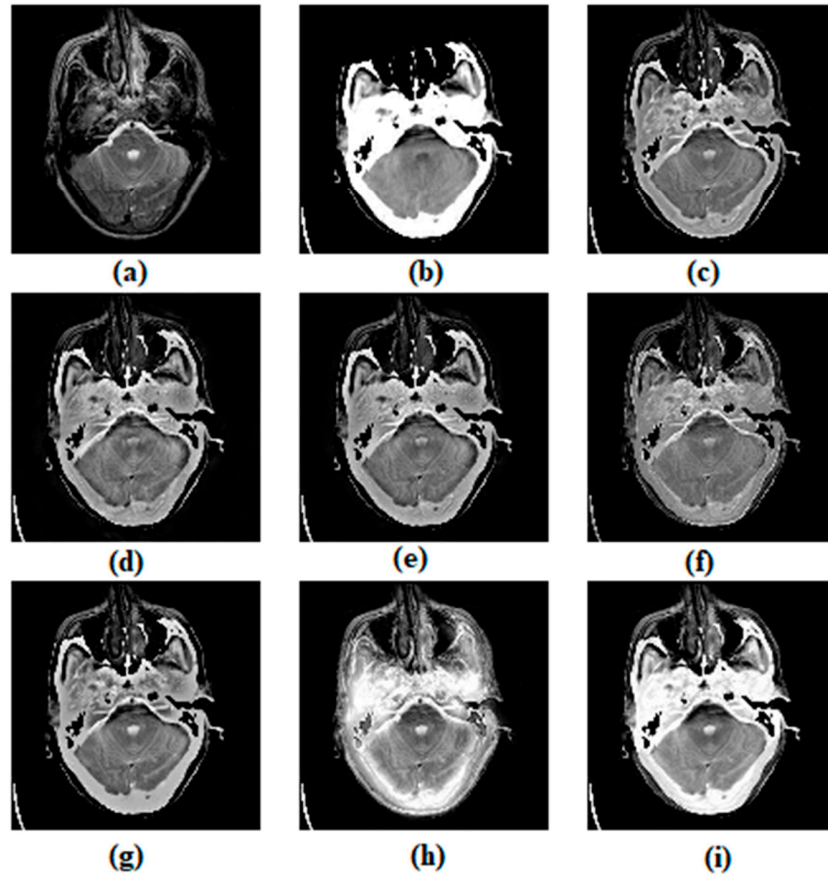

Figure S6 Visual Quality analysis of various fusion algorithms for MRI-CT (a) MRI image, (b) CT image, (c) ASR, (d) CVT, (e) DTCWT, (f) MSVD, (g) CSMCA, (h) NSST, (i) Proposed method

# Quantitative Results:

Table S6. Quantitative analysis of various fusion methods for MRI-CT image pairs (set-6).

| Metrics\Method | ASR     | CVT     | DTCWT   | MSVD    | CSMCA   | NSST    | Proposed Method |
|----------------|---------|---------|---------|---------|---------|---------|-----------------|
| <b>EI</b>      | 86.461  | 90.9278 | 88.3094 | 75.3805 | 88.7043 | 80.9913 | 90.112          |
| <b>MI</b>      | 3.6101  | 3.2676  | 3.3458  | 3.7389  | 3.4263  | 3.494   | 3.8284          |
| <b>VIFF</b>    | 0.3092  | 0.2701  | 0.2621  | 0.3316  | 0.3071  | 0.2855  | 0.4246          |
| $Q_P^{AB/F}$   | 0.5676  | 0.4991  | 0.5212  | 0.4308  | 0.5746  | 0.3856  | 0.5507          |
| <b>SSIM</b>    | 0.583   | 0.3458  | 0.501   | 0.5583  | 0.6228  | 0.528   | 0.5863          |
| <b>RMSE</b>    | 0.0333  | 0.0333  | 0.0335  | 0.0335  | 0.0337  | 0.0263  | 0.0213          |
| <b>AG</b>      | 8.7128  | 9.1433  | 8.9194  | 8.1945  | 8.8494  | 8.2911  | 8.9632          |
| <b>PSNR</b>    | 15.3237 | 15.7526 | 15.9634 | 14.3396 | 15.7314 | 13.9945 | 19.1723         |

## Set-7

# Qualitative Results:

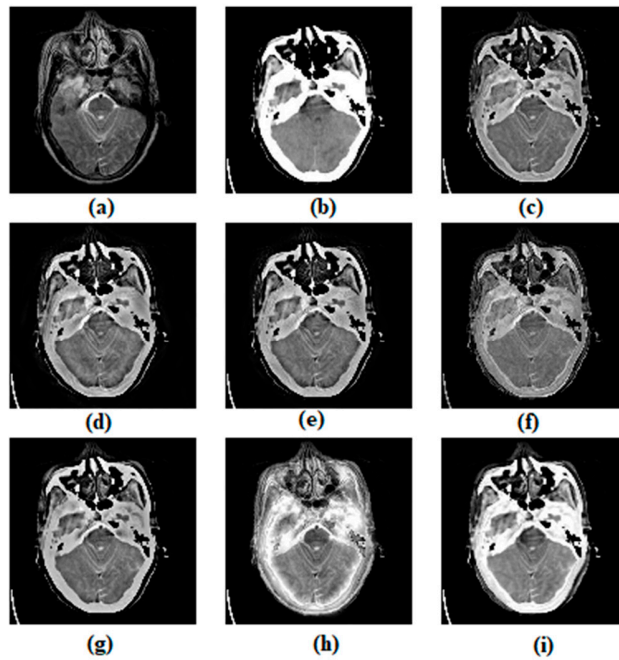

Figure S7 Visual Quality analysis of various fusion algorithms for MRI-CT (a) MRI image, (b) CT image, (c) ASR, (d) CVT, (e) DTCWT, (f) MSVD, (g) CSMCA, (h) NSST, (i) Proposed method

# Quantitative Results:

Table S7. Quantitative analysis of various fusion methods for MRI-CT image pairs (set-7).

| Metrics\Method | ASR | CVT | DTCWT | MSVD | CSMCA | NSST | Proposed Method |
|----------------|-----|-----|-------|------|-------|------|-----------------|
|----------------|-----|-----|-------|------|-------|------|-----------------|



|              |        |         |         |        |         |         |         |
|--------------|--------|---------|---------|--------|---------|---------|---------|
| <b>EI</b>    | 85.184 | 91.4179 | 88.8534 | 77.183 | 87.2195 | 81.9079 | 90.3901 |
| <b>MI</b>    | 3.948  | 3.5486  | 3.6561  | 3.490  | 3.8117  | 3.7038  | 4.0792  |
| <b>VIFF</b>  | 0.3215 | 0.2908  | 0.2801  | 0.3445 | 0.3197  | 0.2675  | 0.4065  |
| $Q_P^{AB/F}$ | 0.5355 | 0.4782  | 0.5005  | 0.4275 | 0.5363  | 0.3733  | 0.5382  |
| <b>SSIM</b>  | 0.5638 | 0.3767  | 0.4999  | 0.5481 | 0.6298  | 0.5209  | 0.6971  |
| <b>RMSE</b>  | 0.0347 | 0.0341  | 0.0346  | 0.0345 | 0.035   | 0.0275  | 0.0209  |
| <b>AG</b>    | 8.561  | 9.1405  | 8.9336  | 8.332  | 8.6749  | 8.3684  | 9.0081  |
| <b>PSNR</b>  | 16.328 | 16.7494 | 17.1661 | 13.285 | 17.3933 | 13.9769 | 21.3423 |

#### Set-8

Qualitative Results:

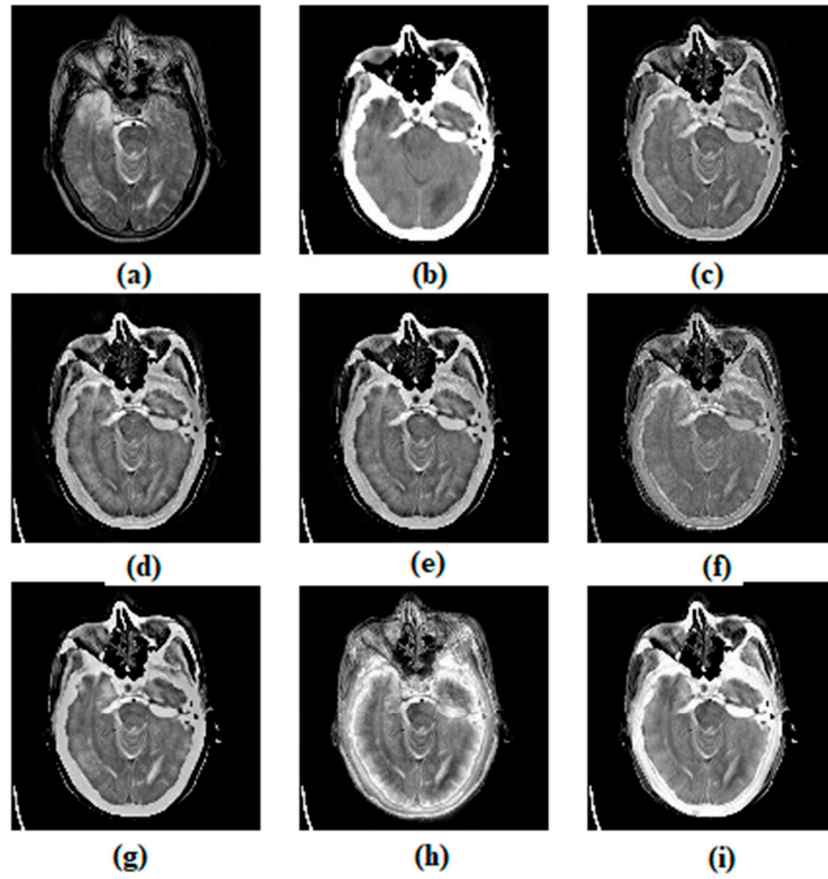

Figure S8 Visual Quality analysis of various fusion algorithms for MRI-CT (a) MRI image, (b) CT image, (c) ASR, (d) CVT, (e) DTCWT, (f) MSVD, (g) CSMCA, (h) NSST, (i) Proposed method



Quantitative Results:

Table S8. Quantitative analysis of various fusion methods for MRI-CT image pairs (set-8).

| Metrics\Method | ASR     | CVT     | DTCWT   | MSVD    | CSMCA   | NSST    | Proposed Method |
|----------------|---------|---------|---------|---------|---------|---------|-----------------|
| <b>EI</b>      | 77.7079 | 87.0281 | 83.6396 | 72.7341 | 81.0891 | 79.5838 | 86.6228         |
| <b>MI</b>      | 4.0686  | 3.691   | 3.8014  | 4.0656  | 4.066   | 3.8275  | 4.148           |
| <b>VIFF</b>    | 0.3118  | 0.2848  | 0.2737  | 0.3331  | 0.3135  | 0.2658  | 0.3988          |
| $Q_P^{AB/F}$   | 0.5022  | 0.4539  | 0.4735  | 0.415   | 0.5159  | 0.3915  | 0.4904          |
| <b>SSIM</b>    | 0.5855  | 0.3628  | 0.5163  | 0.5881  | 0.6125  | 0.5764  | 0.587           |
| <b>RMSE</b>    | 0.0336  | 0.0328  | 0.0331  | 0.0331  | 0.0335  | 0.0275  | 0.0218          |
| <b>AG</b>      | 7.8143  | 8.6748  | 8.3788  | 7.8651  | 8.0243  | 8.0568  | 8.0559          |
| <b>PSNR</b>    | 17.1647 | 17.7603 | 18.2315 | 15.9133 | 18.9643 | 14.285  | 21.1691         |

**Set-9**

Qualitative Results:

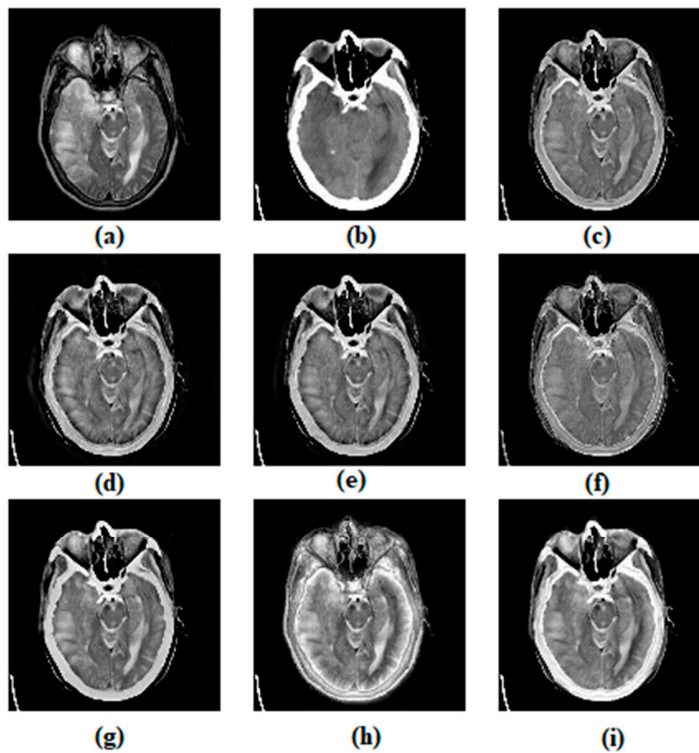

Figure S9 Visual Quality analysis of various fusion algorithms for MRI-CT (a) MRI image, (b) CT image, (c) ASR, (d) CVT, (e) DTCWT, (f) MSVD, (g) CSMCA, (h) NSST, (i) Proposed method

Quantitative Results:

Table S9. Quantitative analysis of various fusion methods for MRI-CT image pairs (set-9).

| Metrics\Method | ASR     | CVT     | DTCWT   | MSVD    | CSMCA   | NSST    | Proposed Method |
|----------------|---------|---------|---------|---------|---------|---------|-----------------|
| <b>EI</b>      | 72.2669 | 82.7381 | 78.4802 | 66.8959 | 75.2837 | 77.6608 | 81.9194         |
| <b>MI</b>      | 4.1219  | 3.7285  | 3.8579  | 4.0649  | 4.1925  | 3.9887  | 4.2275          |
| <b>VIFF</b>    | 0.3099  | 0.2794  | 0.2725  | 0.3184  | 0.3274  | 0.2431  | 0.4012          |
| $Q_P^{AB/F}$   | 0.4959  | 0.4367  | 0.4586  | 0.4034  | 0.5038  | 0.4174  | 0.4907          |
| <b>SSIM</b>    | 0.569   | 0.2959  | 0.4392  | 0.5832  | 0.5391  | 0.6052  | 0.5516          |
| <b>RMSE</b>    | 0.0295  | 0.0294  | 0.0297  | 0.0287  | 0.0294  | 0.0251  | 0.0243          |
| <b>AG</b>      | 7.2062  | 8.1852  | 7.7901  | 7.187   | 7.407   | 7.7243  | 7.2886          |
| <b>PSNR</b>    | 17.6769 | 18.1106 | 18.6802 | 16.3893 | 19.0209 | 14.4343 | 19.4182         |

#### Set-10

Qualitative Results:

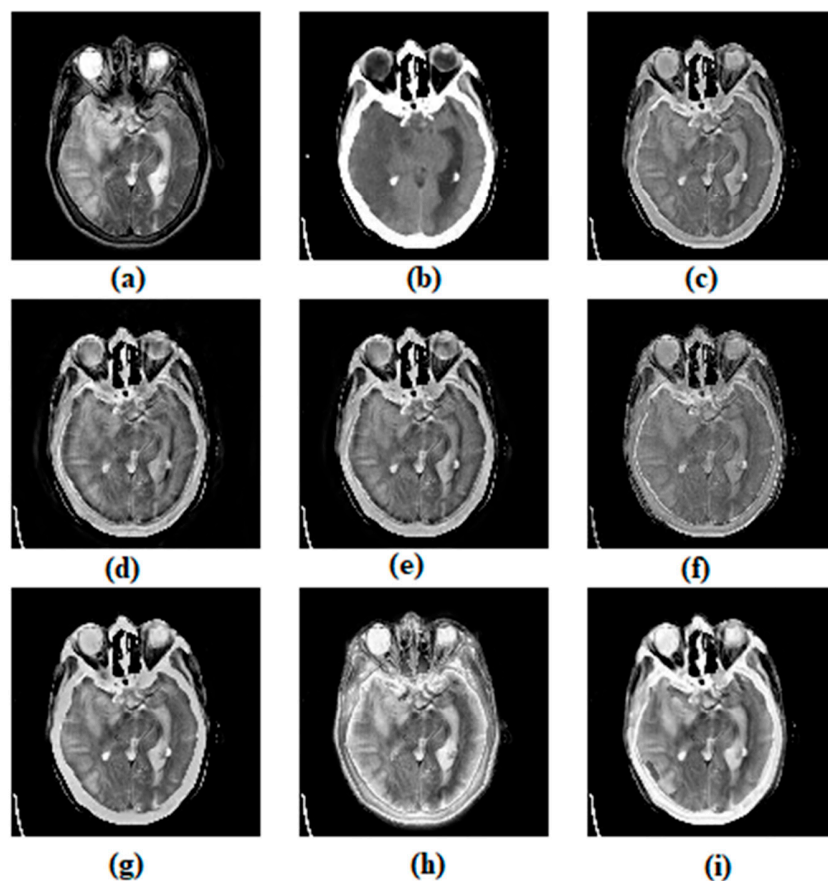

Figure S10 Visual Quality analysis of various fusion algorithms for MRI-CT (a) MRI image, (b) CT image, (c) ASR, (d) CVT, (e) DTCWT, (f) MSVD, (g) CSMCA, (h) NSST, (i) Proposed method

# Quantitative Results:

Table S10. Quantitative analysis of various fusion methods for MRI-CT image pairs (set-10).

| Metrics\Method | ASR     | CVT     | DTCWT  | MSVD    | CSMCA   | NSST    | Proposed Method |
|----------------|---------|---------|--------|---------|---------|---------|-----------------|
| <b>EI</b>      | 71.4805 | 83.5677 | 78.688 | 67.069  | 74.6706 | 79.3392 | 84.3464         |
| <b>MI</b>      | 4.224   | 3.8695  | 3.9902 | 4.1637  | 4.3246  | 4.0892  | 4.3009          |
| <b>VIFF</b>    | 0.2826  | 0.2622  | 0.2542 | 0.2932  | 0.3048  | 0.2337  | 0.3631          |
| $Q_P^{AB/F}$   | 0.484   | 0.4227  | 0.4464 | 0.3951  | 0.4905  | 0.4166  | 0.4947          |
| <b>SSIM</b>    | 0.5841  | 0.2944  | 0.4562 | 0.61    | 0.5786  | 0.5965  | 0.6085          |
| <b>RMSE</b>    | 0.0302  | 0.0299  | 0.0303 | 0.0294  | 0.0303  | 0.0253  | 0.0232          |
| <b>AG</b>      | 7.1308  | 8.2809  | 7.8089 | 7.2549  | 7.3313  | 7.904   | 7.3617          |
| <b>PSNR</b>    | 16.8079 | 17.2214 | 17.737 | 15.8127 | 17.7433 | 13.9559 | 17.3893         |

## Set-11

# Qualitative Results:

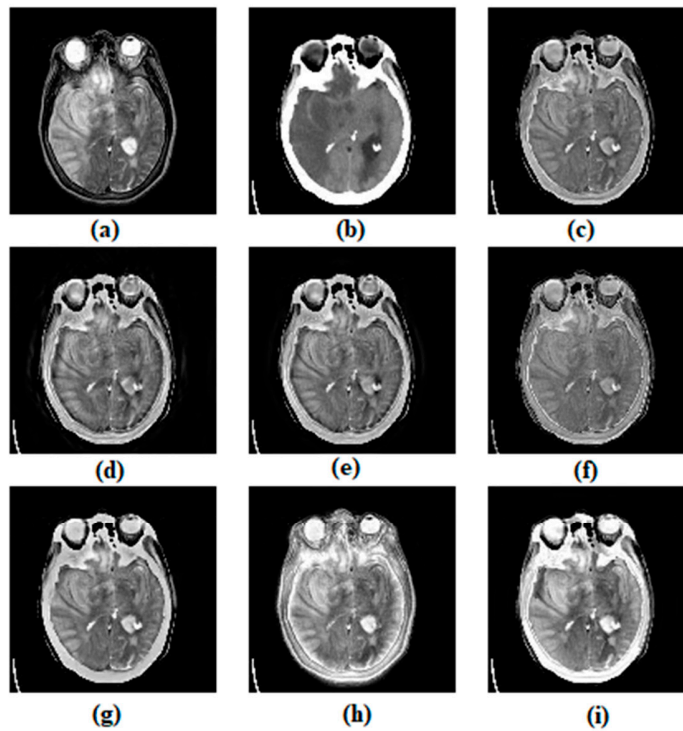

Figure S11 Visual Quality analysis of various fusion algorithms for MRI-CT (a) MRI image, (b) CT image, (c) ASR, (d) CVT, (e) DTCWT, (f) MSVD, (g) CSMCA, (h) NSST, (i) Proposed method

# Quantitative Results:

Table S11. Quantitative analysis of various fusion methods for MRI-CT image pairs (set-11).

| Metrics\Method | ASR     | CVT     | DTCWT   | MSVD    | CSMCA   | NSST    | Proposed Method |
|----------------|---------|---------|---------|---------|---------|---------|-----------------|
| <b>EI</b>      | 67.0269 | 79.9448 | 75.0863 | 64.1693 | 70.4353 | 75.3184 | 80.0877         |
| <b>MI</b>      | 4.2798  | 3.9046  | 4.0306  | 4.2275  | 4.3462  | 4.1166  | 4.3392          |
| <b>VIFF</b>    | 0.2727  | 0.2548  | 0.2496  | 0.2863  | 0.2976  | 0.241   | 0.3567          |
| $Q_p^{AB/F}$   | 0.4728  | 0.4218  | 0.4356  | 0.3924  | 0.4816  | 0.42    | 0.4804          |
| <b>SSIM</b>    | 0.5931  | 0.2769  | 0.4139  | 0.3012  | 0.5378  | 0.6007  | 0.5999          |
| <b>RMSE</b>    | 0.0294  | 0.0295  | 0.0298  | 0.0286  | 0.0293  | 0.0244  | 0.021           |
| <b>AG</b>      | 6.6622  | 7.8871  | 7.4212  | 6.8124  | 6.8773  | 7.4713  | 7.9801          |
| <b>PSNR</b>    | 16.8577 | 17.1716 | 17.7201 | 15.8049 | 17.8928 | 13.9817 | 17.7945         |

#### Set-12

Qualitative Results:

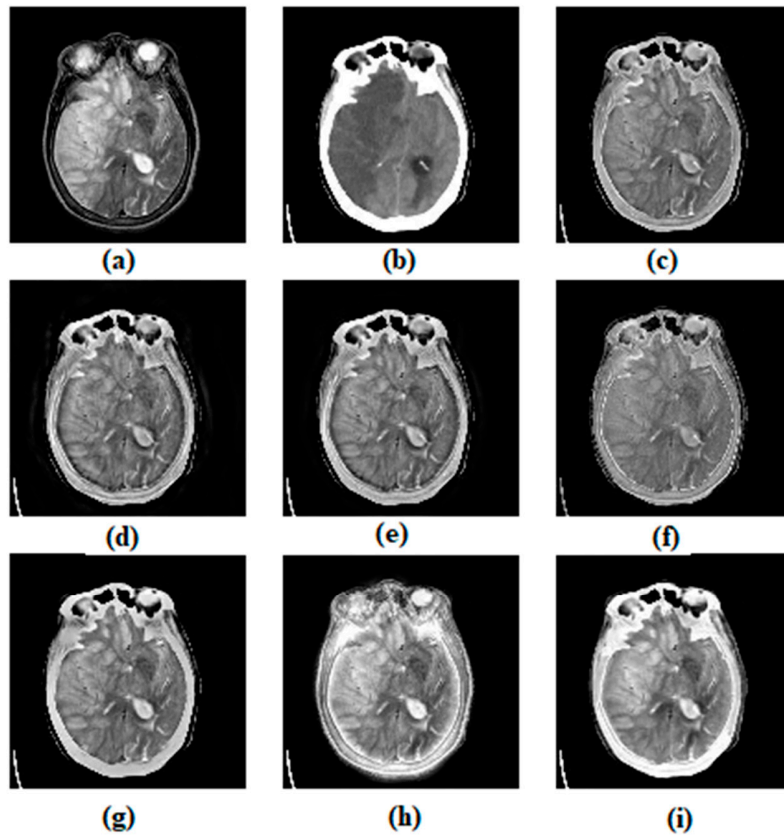

Figure S12 Visual Quality analysis of various fusion algorithms for MRI-CT (a) MRI image, (b) CT image, (c) ASR, (d) CVT, (e) DTCWT, (f) MSVD, (g) CSMCA, (h) NSST, (i) Proposed method

# Quantitative Results:

Table S12. Quantitative analysis of various fusion methods for MRI-CT image pairs (set-12).

| Metrics\Method | ASR     | CVT     | DTCWT   | MSVD    | CSMCA   | NSST    | Proposed Method |
|----------------|---------|---------|---------|---------|---------|---------|-----------------|
| <b>EI</b>      | 63.3066 | 75.1589 | 70.2961 | 58.8965 | 64.9005 | 71.3852 | 74.1073         |
| <b>MI</b>      | 4.221   | 3.9235  | 4.0232  | 4.2152  | 4.2863  | 4.1673  | 4.4576          |
| <b>VIFF</b>    | 0.3133  | 0.3006  | 0.3036  | 0.3178  | 0.3378  | 0.2595  | 0.4129          |
| $Q_P^{AB/F}$   | 0.4853  | 0.4417  | 0.4522  | 0.3916  | 0.4855  | 0.4165  | 0.4871          |
| <b>SSIM</b>    | 0.633   | 0.3088  | 0.4627  | 0.6538  | 0.6017  | 0.5889  | 0.6411          |
| <b>RMSE</b>    | 0.029   | 0.0293  | 0.0295  | 0.0284  | 0.0294  | 0.0244  | 0.0211          |
| <b>AG</b>      | 6.3146  | 7.4159  | 6.9621  | 6.3127  | 6.371   | 7.0742  | 6.6677          |
| <b>PSNR</b>    | 16.9081 | 17.274  | 17.6524 | 15.8891 | 18.083  | 13.696  | 18.0546         |

## Set 13

# Qualitative Results:

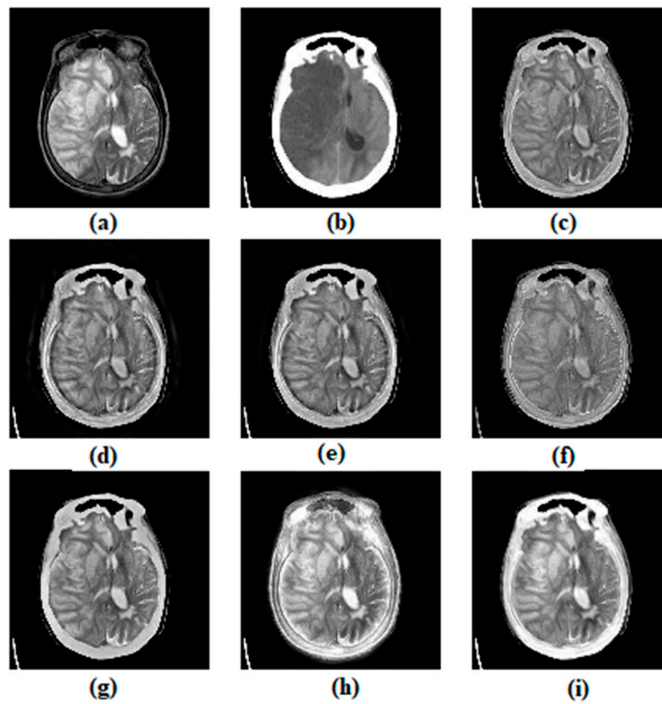

Figure S13 Visual Quality analysis of various fusion algorithms for MRI-CT (a) MRI image, (b) CT image, (c) ASR, (d) CVT, (e) DTCWT, (f) MSVD, (g) CSMCA, (h) NSST, (i) Proposed method

# Quantitative Results:

Table S13. Quantitative analysis of various fusion methods for MRI-CT image pairs (set-13).

| Metrics\Method | ASR     | CVT     | DTCWT   | MSVD    | CSMCA   | NSST    | Proposed Method |
|----------------|---------|---------|---------|---------|---------|---------|-----------------|
| <b>EI</b>      | 60.3544 | 72.2775 | 67.7116 | 55.9661 | 61.5929 | 71.658  | 72.6793         |
| <b>MI</b>      | 4.1673  | 3.899   | 3.9942  | 4.1417  | 4.3262  | 4.2127  | 4.5437          |
| <b>VIFF</b>    | 0.383   | 0.3831  | 0.388   | 0.3619  | 0.4281  | 0.3137  | 0.5096          |
| $Q_P^{AB/F}$   | 0.4916  | 0.4503  | 0.4586  | 0.3973  | 0.4963  | 0.4442  | 0.4818          |
| <b>SSIM</b>    | 0.6361  | 0.3324  | 0.463   | 0.6418  | 0.6167  | 0.5513  | 0.6755          |
| <b>RMSE</b>    | 0.0283  | 0.0289  | 0.0289  | 0.0274  | 0.0287  | 0.0239  | 0.0209          |
| <b>AG</b>      | 6       | 7.1053  | 6.6841  | 5.99    | 6.0253  | 7.0685  | 6.9367          |
| <b>PSNR</b>    | 16.7489 | 16.9593 | 17.255  | 15.921  | 18.0212 | 13.5916 | 17.4659         |

#### Set-14

Qualitative Results:

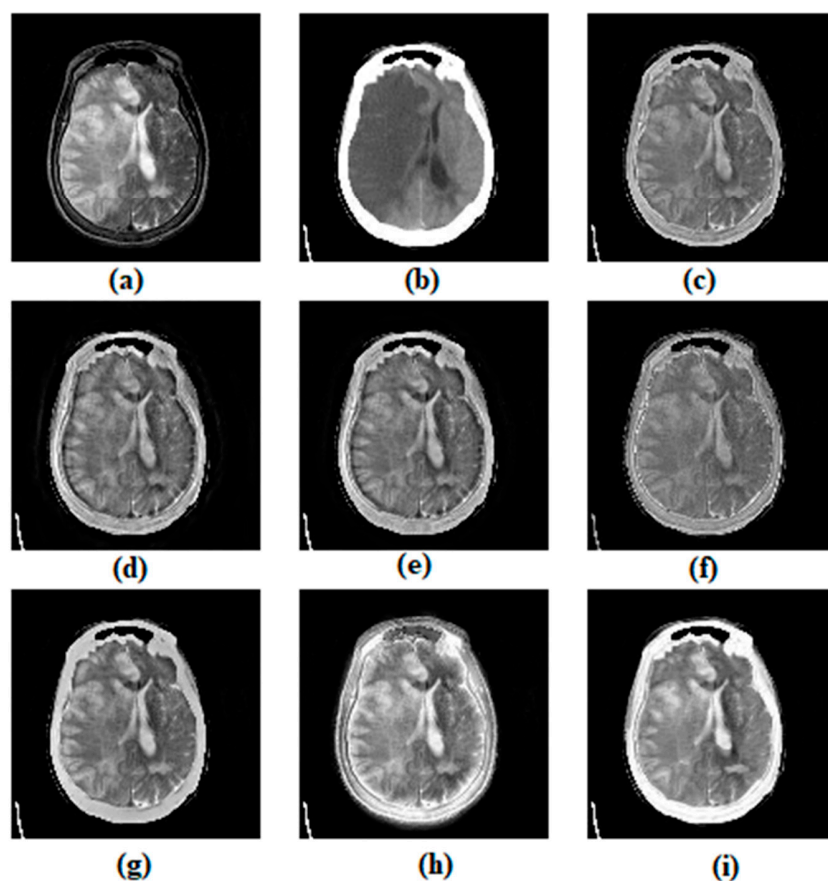

Figure S14 Visual Quality analysis of various fusion algorithms for MRI-CT (a) MRI image, (b) CT image, (c) ASR, (d) CVT, (e) DTCWT, (f) MSVD, (g) CSMCA, (h) NSST, (i) Proposed method

Quantitative Results:

Table S14. Quantitative analysis of various fusion methods for MRI-CT image pairs (set-14).

| Metrics\Method | ASR     | CVT     | DTCWT   | MSVD    | CSMCA   | NSST    | Proposed Method |
|----------------|---------|---------|---------|---------|---------|---------|-----------------|
| <b>EI</b>      | 56.2257 | 66.9353 | 63.0619 | 53.2579 | 56.2579 | 67.6827 | 65.0256         |
| <b>MI</b>      | 4.3223  | 3.9103  | 4.0403  | 4.3141  | 4.3643  | 4.1696  | 4.519           |
| <b>VIFF</b>    | 0.3849  | 0.3856  | 0.3887  | 0.3718  | 0.4442  | 0.3542  | 0.5314          |
| $Q_p^{AB/F}$   | 0.4747  | 0.4337  | 0.4452  | 0.3932  | 0.4685  | 0.4335  | 0.49            |
| <b>SSIM</b>    | 0.5891  | 0.3416  | 0.4601  | 0.5723  | 0.5281  | 0.5497  | 0.5835          |
| <b>RMSE</b>    | 0.0291  | 0.0292  | 0.0295  | 0.0285  | 0.0294  | 0.0231  | 0.0198          |
| <b>AG</b>      | 5.6045  | 6.5908  | 6.2317  | 5.6618  | 5.506   | 6.6806  | 6.4695          |
| <b>PSNR</b>    | 16.8812 | 17.0379 | 17.3586 | 16.0857 | 18.253  | 14.0891 | 18.069          |

#### Set 15

Qualitative Results:

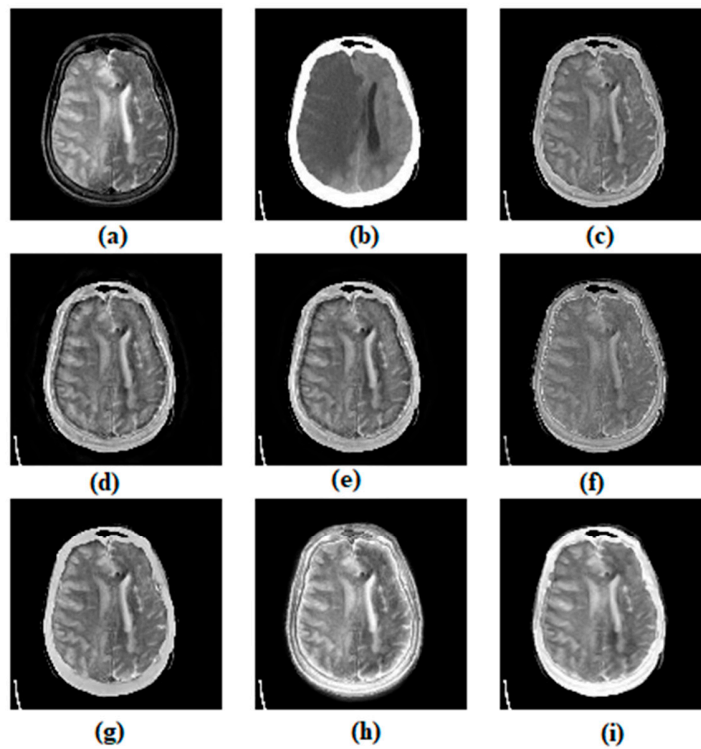

Figure S15 Visual Quality analysis of various fusion algorithms for MRI-CT (a) MRI image, (b) CT image, (c) ASR, (d) CVT, (e) DTCWT, (f) MSVD, (g) CSMCA, (h) NSST, (i) Proposed method

Quantitative Results:

Table S15. Quantitative analysis of various fusion methods for MRI-CT image pairs (set-15).



| Metrics\Method | ASR     | CVT     | DTCWT   | MSVD    | CSMCA   | NSST    | Proposed Method |
|----------------|---------|---------|---------|---------|---------|---------|-----------------|
| <b>EI</b>      | 51.347  | 63.8778 | 58.3551 | 49.7323 | 51.8998 | 65.4742 | 65.8021         |
| <b>MI</b>      | 4.1861  | 3.8787  | 3.9959  | 4.0904  | 4.2847  | 4.2144  | 4.5491          |
| <b>VIFF</b>    | 0.3569  | 0.3622  | 0.3654  | 0.3484  | 0.41    | 0.3403  | 0.4846          |
| $Q_P^{AB/F}$   | 0.4652  | 0.4189  | 0.4315  | 0.3801  | 0.4616  | 0.4463  | 0.4782          |
| <b>SSIM</b>    | 0.6747  | 0.3382  | 0.5073  | 0.417   | 0.6637  | 0.5908  | 0.6941          |
| <b>RMSE</b>    | 0.0286  | 0.0293  | 0.0296  | 0.0269  | 0.028   | 0.0224  | 0.018           |
| <b>AG</b>      | 5.0655  | 6.2317  | 5.7194  | 5.197   | 5.0452  | 6.3492  | 6.3267          |
| <b>PSNR</b>    | 17.3966 | 17.268  | 17.6494 | 16.392  | 18.6447 | 14.0968 | 18.0241         |

#### Set 16

Qualitative Results:

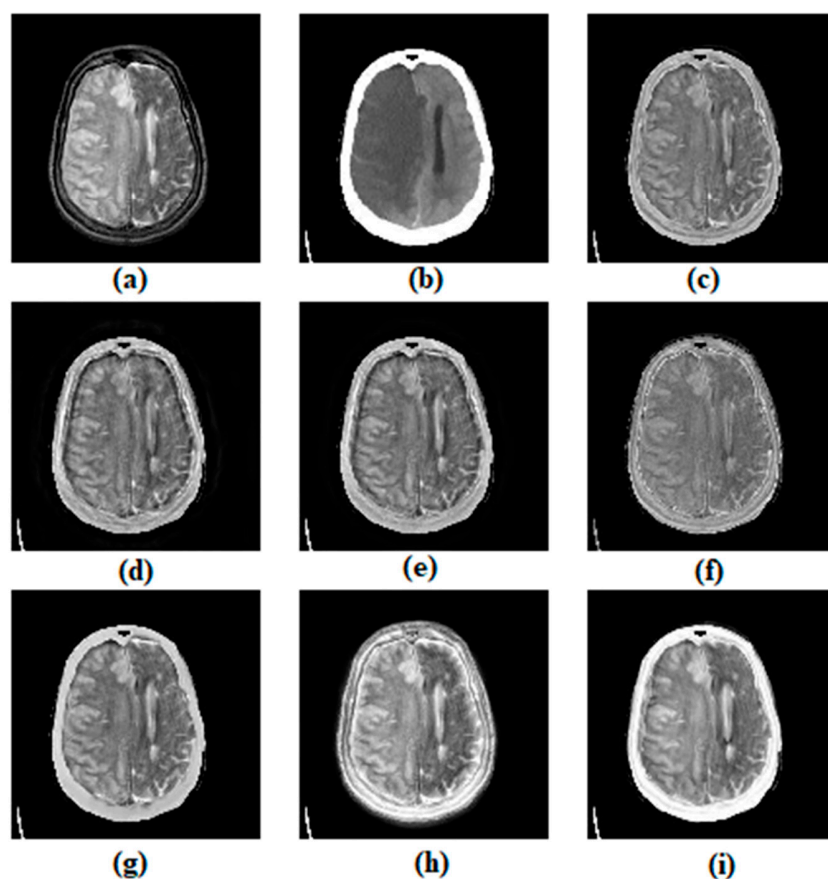

Figure S16 Visual Quality analysis of various fusion algorithms for MRI-CT (a) MRI image, (b) CT image, (c) ASR, (d) CVT, (e) DTCWT, (f) MSVD, (g) CSMCA, (h) NSST, (i) Proposed method

Quantitative Results:

Table S16. Quantitative analysis of various fusion methods for MRI-CT image pairs (set-16).

| Metrics\Method | ASR     | CVT     | DTCWT   | MSVD    | CSMCA   | NSST    | Proposed Method |
|----------------|---------|---------|---------|---------|---------|---------|-----------------|
| <b>EI</b>      | 50.8108 | 60.7797 | 56.3032 | 47.2098 | 50.7231 | 63.4633 | 63.4305         |
| <b>MI</b>      | 4.1596  | 3.8698  | 3.9794  | 4.0947  | 4.2586  | 4.248   | 4.5075          |
| <b>VIFF</b>    | 0.3664  | 0.3685  | 0.3732  | 0.3571  | 0.4215  | 0.3544  | 0.4997          |
| $Q_p^{AB/F}$   | 0.4828  | 0.4226  | 0.4396  | 0.3865  | 0.4665  | 0.4487  | 0.4651          |
| <b>SSIM</b>    | 0.7182  | 0.3569  | 0.5271  | 0.7158  | 0.697   | 0.6139  | 0.6623          |
| <b>RMSE</b>    | 0.028   | 0.0289  | 0.0294  | 0.0276  | 0.0276  | 0.0224  | 0.0211          |
| <b>AG</b>      | 5.0009  | 5.8984  | 5.4928  | 4.9608  | 4.9154  | 6.128   | 5.9004          |
| <b>PSNR</b>    | 17.3222 | 17.6025 | 17.852  | 16.5241 | 18.6362 | 14.3464 | 18.7951         |

### Set 17

Qualitative Results:

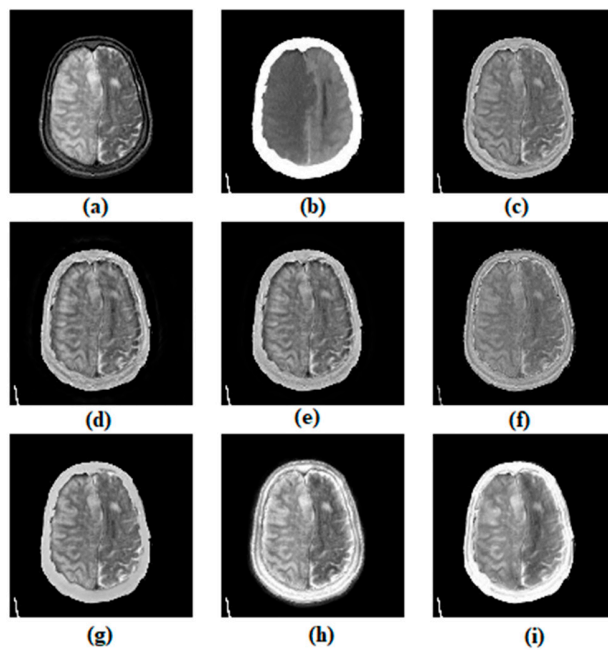

Figure S17 Visual Quality analysis of various fusion algorithms for MRI-CT (a) MRI image, (b) CT image, (c) ASR, (d) CVT, (e) DTCWT, (f) MSVD, (g) CSMCA, (h) NSST, (i) Proposed method

Quantitative Results:

Table S17. Quantitative analysis of various fusion methods for MRI-CT image pairs (set-17).

| Metrics\Method | ASR | CVT | DTCWT | MSVD | CSMCA | NSST | Proposed Method |
|----------------|-----|-----|-------|------|-------|------|-----------------|
|----------------|-----|-----|-------|------|-------|------|-----------------|

|              |         |         |         |         |         |         |         |
|--------------|---------|---------|---------|---------|---------|---------|---------|
| <b>EI</b>    | 46.9902 | 55.0101 | 50.5375 | 43.7345 | 46.097  | 57.4709 | 56.0753 |
| <b>MI</b>    | 4.0721  | 3.8249  | 3.927   | 4.0723  | 4.221   | 4.2423  | 4.3071  |
| <b>VIFF</b>  | 0.4157  | 0.4169  | 0.4161  | 0.4011  | 0.4734  | 0.4047  | 0.5652  |
| $Q_P^{AB/F}$ | 0.5032  | 0.4453  | 0.4427  | 0.4153  | 0.4659  | 0.432   | 0.4963  |
| <b>SSIM</b>  | 0.7215  | 0.3482  | 0.5118  | 0.7253  | 0.6978  | 0.5813  | 0.7239  |
| <b>RMSE</b>  | 0.0268  | 0.0269  | 0.0272  | 0.0258  | 0.0265  | 0.0226  | 0.0197  |
| <b>AG</b>    | 4.5894  | 5.3332  | 4.928   | 4.5221  | 4.4524  | 5.5218  | 5.689   |
| <b>PSNR</b>  | 17.4978 | 17.7076 | 18.0147 | 16.6851 | 19.0247 | 15.4633 | 19.4565 |

#### Set 18

Qualitative Results:

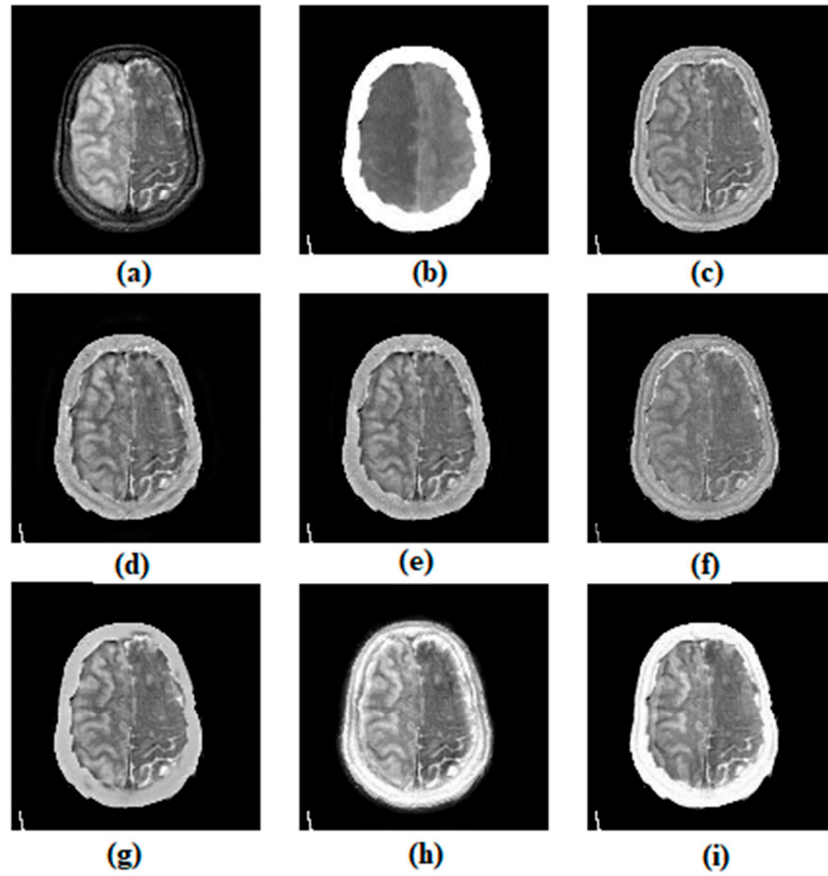

Figure S18 Visual Quality analysis of various fusion algorithms for MRI-CT (a) MRI image, (b) CT image, (c) ASR, (d) CVT, (e) DTCWT, (f) MSVD, (g) CSMCA, (h) NSST, (i) Proposed method

Quantitative Results:

Table S18. Quantitative analysis of various fusion methods for MRI-CT image pairs (set-18).

| Metrics\Method | ASR     | CVT     | DTCWT   | MSVD    | CSMCA   | NSST    | Proposed Method |
|----------------|---------|---------|---------|---------|---------|---------|-----------------|
| <b>EI</b>      | 46.9661 | 50.9895 | 48.2714 | 41.3792 | 43.9382 | 52.2594 | 50.6012         |
| <b>MI</b>      | 3.968   | 3.7472  | 3.8269  | 3.9772  | 4.0663  | 4.2281  | 4.2207          |
| <b>VIFF</b>    | 0.4625  | 0.4532  | 0.4553  | 0.4331  | 0.5161  | 0.4632  | 0.6091          |
| $Q_p^{AB/F}$   | 0.5547  | 0.4589  | 0.4658  | 0.4377  | 0.483   | 0.4249  | 0.5599          |
| <b>SSIM</b>    | 0.7406  | 0.3585  | 0.5268  | 0.7341  | 0.7023  | 0.5634  | 0.7641          |
| <b>RMSE</b>    | 0.0277  | 0.028   | 0.0281  | 0.027   | 0.0276  | 0.0231  | 0.0188          |
| <b>AG</b>      | 4.5819  | 4.9629  | 4.7145  | 4.2475  | 4.2433  | 5.0346  | 4.9241          |
| <b>PSNR</b>    | 17.2595 | 17.4106 | 17.7112 | 16.6737 | 18.8651 | 16.9005 | 21.6782         |

### Set 19

Qualitative Results:

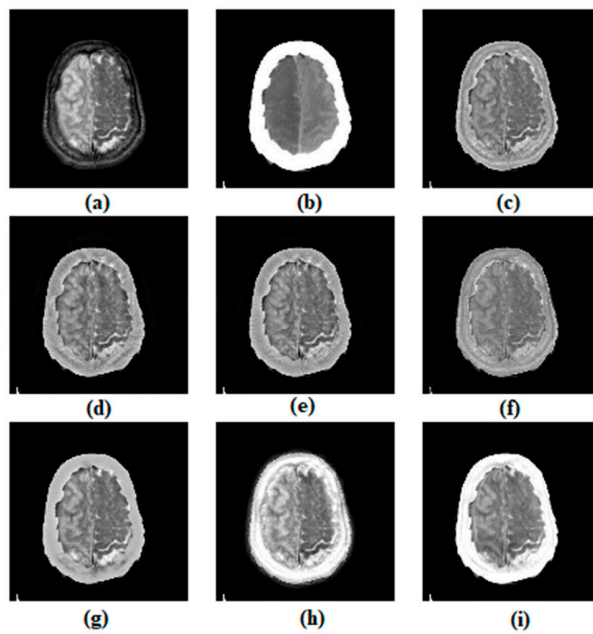

Figure S19 Visual Quality analysis of various fusion algorithms for MRI-CT (a) MRI image, (b) CT image, (c) ASR, (d) CVT, (e) DTCWT, (f) MSVD, (g) CSMCA, (h) NSST, (i) Proposed method

Quantitative Results:

Table S19. Quantitative analysis of various fusion methods for MRI-CT image pairs (set-19).

| Metrics\Method | ASR     | CVT     | DTCWT   | MSVD    | CSMCA   | NSST    | Proposed Method |
|----------------|---------|---------|---------|---------|---------|---------|-----------------|
| <b>EI</b>      | 41.8844 | 44.5302 | 42.9182 | 35.7511 | 39.2105 | 44.8426 | 40.5683         |

|              |         |         |         |         |         |         |         |
|--------------|---------|---------|---------|---------|---------|---------|---------|
| <b>MI</b>    | 3.8663  | 3.6562  | 3.7345  | 3.9277  | 3.9606  | 4.162   | 4.0931  |
| <b>VIFF</b>  | 0.4902  | 0.4774  | 0.4761  | 0.4505  | 0.5376  | 0.5121  | 0.6551  |
| $Q_P^{AB/F}$ | 0.5637  | 0.4644  | 0.4806  | 0.4346  | 0.499   | 0.4016  | 0.5675  |
| <b>SSIM</b>  | 0.7493  | 0.3495  | 0.5385  | 0.7334  | 0.7032  | 0.5337  | 0.7602  |
| <b>RMSE</b>  | 0.0287  | 0.0286  | 0.0289  | 0.0281  | 0.0287  | 0.0226  | 0.0182  |
| <b>AG</b>    | 4.0844  | 4.3247  | 4.1935  | 3.6625  | 3.7854  | 4.3368  | 4.8548  |
| <b>PSNR</b>  | 16.7619 | 16.7788 | 16.9792 | 16.3013 | 18.1522 | 18.3057 | 23.9398 |

#### Set 20

Qualitative Results:

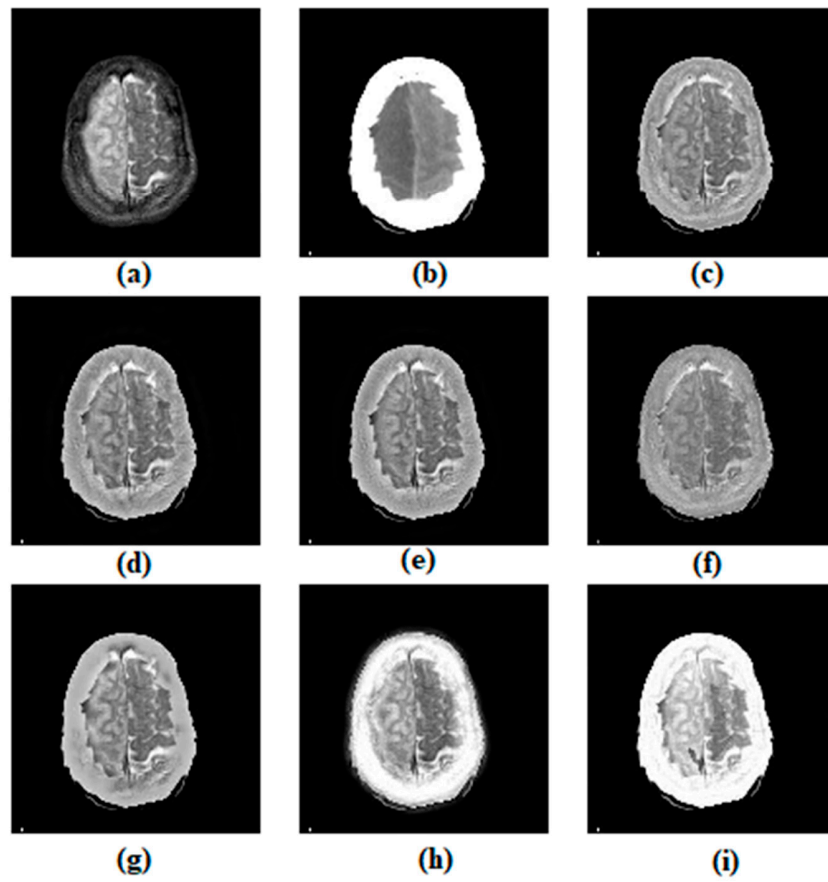

Figure S20 Visual Quality analysis of various fusion algorithms for MRI-CT (a) MRI image, (b) CT image, (c) ASR, (d) CVT, (e) DTCWT, (f) MSVD, (g) CSMCA, (h) NSST, (i) Proposed method

Quantitative Results:

Table S20. Quantitative analysis of various fusion methods for MRI-CT image pairs (set-20).

| Metrics\Method | ASR     | CVT     | DTCWT   | MSVD    | CSMCA   | NSST    | Proposed Method |
|----------------|---------|---------|---------|---------|---------|---------|-----------------|
| <b>EI</b>      | 40.2869 | 42.7289 | 41.61   | 33.7094 | 38.0134 | 40.8352 | 39.8888         |
| <b>MI</b>      | 3.6189  | 3.4463  | 3.4919  | 3.7     | 3.5678  | 3.8949  | 3.7529          |
| <b>VIFF</b>    | 0.5225  | 0.5158  | 0.5178  | 0.4817  | 0.5574  | 0.5516  | 0.7003          |
| $Q_p^{AB/F}$   | 0.5877  | 0.5107  | 0.5252  | 0.4499  | 0.5367  | 0.4118  | 0.5922          |
| <b>SSIM</b>    | 0.7613  | 0.3841  | 0.5796  | 0.7505  | 0.7143  | 0.5336  | 0.7692          |
| <b>RMSE</b>    | 0.0289  | 0.0289  | 0.0291  | 0.0286  | 0.0289  | 0.0219  | 0.0134          |
| <b>AG</b>      | 3.9694  | 4.1899  | 4.1025  | 3.4792  | 3.6948  | 4.034   | 4.2538          |
| <b>PSNR</b>    | 16.5067 | 16.4668 | 16.6105 | 16.158  | 17.3056 | 19.9832 | 19.749          |

**Set-21:**

Qualitative Results:

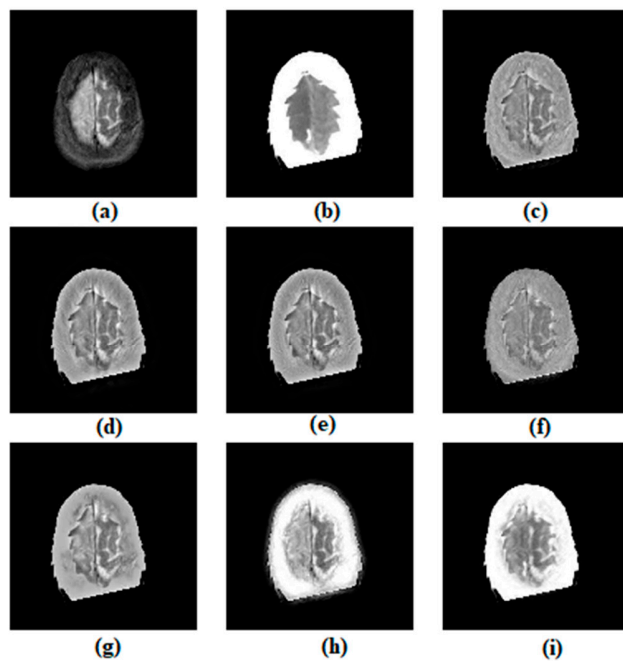

Figure S21 Visual Quality analysis of various fusion algorithms for MRI-CT (a) MRI image, (b) CT image, (c) ASR, (d) CVT, (e) DTCWT, (f) MSVD, (g) CSMCA, (h) NSST, (i) Proposed method

Quantitative Results:

Table S21. Quantitative analysis of various fusion methods for MRI-CT image pairs (set-21).

| Metrics\Method | ASR | CVT | DTCWT | MSVD | CSMCA | NSST | Proposed Method |
|----------------|-----|-----|-------|------|-------|------|-----------------|
|----------------|-----|-----|-------|------|-------|------|-----------------|

|              |         |         |         |         |         |         |         |
|--------------|---------|---------|---------|---------|---------|---------|---------|
| <b>EI</b>    | 30.7689 | 33.2918 | 32.7771 | 25.9329 | 29.3327 | 31.8295 | 29.324  |
| <b>MI</b>    | 3.2092  | 3.0091  | 3.0427  | 3.2625  | 3.0578  | 3.4172  | 3.3492  |
| <b>VIFF</b>  | 0.5294  | 0.5247  | 0.529   | 0.4863  | 0.5684  | 0.5632  | 0.7251  |
| $Q_P^{AB/F}$ | 0.5668  | 0.4982  | 0.5167  | 0.4347  | 0.5182  | 0.3976  | 0.5609  |
| <b>SSIM</b>  | 0.7718  | 0.3932  | 0.592   | 0.7651  | 0.758   | 0.5493  | 0.7491  |
| <b>RMSE</b>  | 0.0278  | 0.0277  | 0.0278  | 0.0275  | 0.0276  | 0.0198  | 0.0157  |
| <b>AG</b>    | 3.0369  | 3.2457  | 3.2143  | 2.6867  | 2.8434  | 3.1407  | 3.07993 |
| <b>PSNR</b>  | 16.5904 | 16.5325 | 16.6093 | 16.1786 | 17.2145 | 21.385  | 26.7971 |

## Set 22

Qualitative Results:

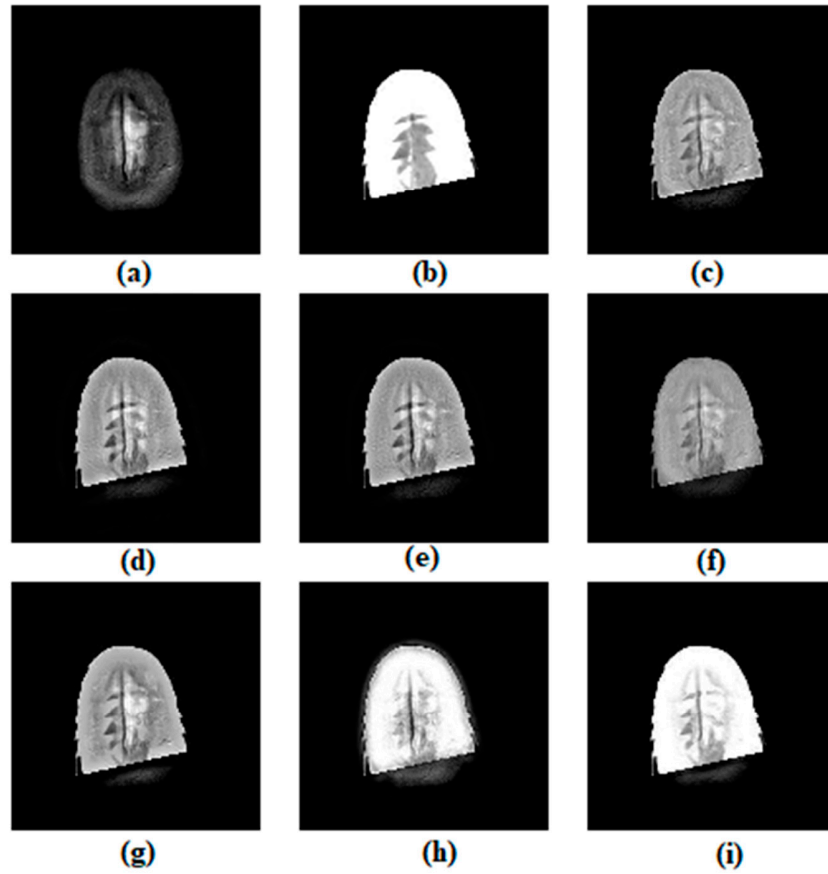

Figure S22 Visual Quality analysis of various fusion algorithms for MRI-CT (a) MRI image, (b) CT image, (c) ASR, (d) CVT, (e) DTCWT, (f) MSVD, (g) CSMCA, (h) NSST, (i) Proposed method



# Quantitative Results:

Table S22. Quantitative analysis of various fusion methods for MRI-CT image pairs (set-22).

| Metrics\Method | ASR     | CVT     | DTCWT   | MSVD    | CSMCA   | NSST    | Proposed Method |
|----------------|---------|---------|---------|---------|---------|---------|-----------------|
| <b>EI</b>      | 24.5366 | 26.9305 | 26.3521 | 17.594  | 24.3594 | 24.8056 | 23.761          |
| <b>MI</b>      | 2.7081  | 2.5402  | 2.5691  | 2.812   | 2.6135  | 2.7206  | 2.5729          |
| <b>VIFF</b>    | 0.5657  | 0.5609  | 0.5666  | 0.4842  | 0.607   | 0.5853  | 0.7798          |
| $Q_p^{AB/F}$   | 0.5915  | 0.5147  | 0.538   | 0.318   | 0.5792  | 0.434   | 0.5806          |
| <b>SSIM</b>    | 0.817   | 0.4477  | 0.6579  | 0.8048  | 0.7926  | 0.639   | 0.8293          |
| <b>RMSE</b>    | 0.0255  | 0.0255  | 0.0254  | 0.0254  | 0.0254  | 0.017   | 0.0121          |
| <b>AG</b>      | 2.4237  | 2.629   | 2.5865  | 1.7947  | 2.363   | 2.4529  | 2.7203          |
| <b>PSNR</b>    | 17.0982 | 17.1329 | 17.0664 | 16.6585 | 17.261  | 22.5953 | 26.5235         |

## Set-23

# Qualitative Results:

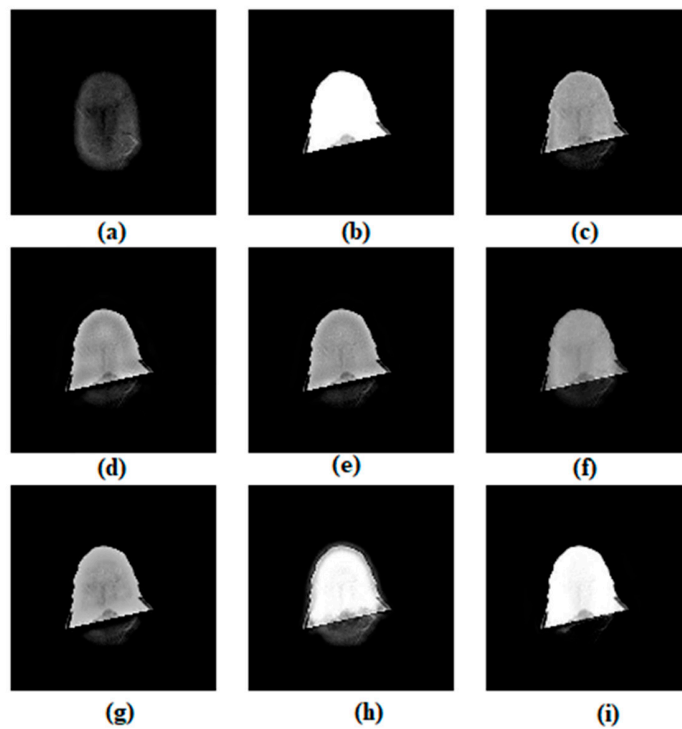

Figure S23 Visual Quality analysis of various fusion algorithms for MRI-CT (a) MRI image, (b) CT image, (c) ASR, (d) CVT, (e) DTCWT, (f) MSVD, (g) CSMCA, (h) NSST, (i) Proposed method

Quantitative Results:

Table S23. Quantitative analysis of various fusion methods for MRI-CT image pairs (set-23).

| Metrics\Method | ASR     | CVT     | DTCWT   | MSVD    | CSMCA   | NSST    | Proposed Method |
|----------------|---------|---------|---------|---------|---------|---------|-----------------|
| <b>EI</b>      | 14.1507 | 15.1794 | 14.7927 | 9.9025  | 13.4509 | 15.634  | 14.624          |
| <b>MI</b>      | 1.9049  | 1.7319  | 1.7702  | 2.0272  | 1.8277  | 1.943   | 1.6781          |
| <b>VIFF</b>    | 0.6189  | 0.6135  | 0.6215  | 0.5325  | 0.68    | 0.6735  | 0.8636          |
| $Q_p^{AB/F}$   | 0.6091  | 0.5627  | 0.5815  | 0.318   | 0.5797  | 0.5237  | 0.5969          |
| <b>SSIM</b>    | 0.8527  | 0.5163  | 0.7247  | 0.8458  | 0.8412  | 0.7174  | 0.8167          |
| <b>RMSE</b>    | 0.0203  | 0.0203  | 0.0203  | 0.0202  | 0.0203  | 0.012   | 0.0118          |
| <b>AG</b>      | 1.4305  | 1.5126  | 1.4836  | 1.034   | 1.3285  | 1.5723  | 1.809           |
| <b>PSNR</b>    | 18.4036 | 18.4232 | 18.4847 | 17.8665 | 19.0329 | 24.5132 | 33.8492         |
